# Supplementary material for: Colour mimicry and sexual deception by Tongue orchids (Cryptostylis)
Source: Springer Nature journal article supplement (doi:10.1007/s00114-009-0611-0), 2009-10-01
Supplement: MOESM4 [file 114_2009_611_MOESM4_ESM.doc]

**Online Resource 4** Colour contrasts between labellae of sexually deceptive *Cryptostylis* orchid species

|  | *C. ovata*  (Albany) | *C. leptochila*  (Melbourne) | *C. subulata*  (Sydney) | *C. subulata*  (NZ) |
| --- | --- | --- | --- | --- |
| *Cryptostylis erecta* (Sydney) | 0.066 | **0.058** | 0.082 | 0.087 |
| *C. subulata* (NZ) | **0.029** | 0.074 | **0.018** | **-** |
| *C. subulata* (Sydney) | **0.016** | **0.058** | **-** | **-** |
| *C. leptochila* (Melbourne) | **0.046** | - | - | - |

*Cryptostylis ovata* is allopatric, but *C. erecta*, *C. subulata* and *C. leptochila* co-occur. Calculations are according to Chittka (1992). *C. subulata* was collected from populations in Australia (Aus.) and New Zealand (NZ), but all other species are only from Australia. Values in bold are less than 0.062, a conservative threshold indicating undetectable colour differences (Dyer & Chittka 2004).
